# Supplementary material for: Design and Investigation of New Water-Soluble Forms of α-Tocopherol with Antioxidant and Antiglycation Activity Using Amphiphilic Copolymers of N-Vinylpyrrolidone
Source: MDPI journal article supplement (doi:10.3390/pharmaceutics15051388), 2023-04-30
Supplement: s1 [file s1]

# Supplementary Materials: Design and investigation of new water-soluble forms of $\alpha$ -tocopherol with antioxidant and antiglycation activity using amphiphilic copolymers of N-vinylpyrrolidone

Yuliya V. Soldatova<sup>1\*</sup>, Irina I. Faingold<sup>1</sup>, Darya A. Poletaeva<sup>1</sup>, Alexei V. Kozlov<sup>1</sup>, Nina S. Emel'yanova<sup>1</sup>, Igor I. Khodos<sup>1</sup>, Dmitry A. Chernyaev<sup>1</sup>, Svetlana V. Kurmaz<sup>1</sup>

**Table S1.** Concentrations of reagents and conditions for TP encapsulation in CPL1

| [CPL1] in IPA/mg mL <sup>-1</sup> | [TP] in IPA/mg mL <sup>-1</sup> | Volume ratios of solutions copolymer and TP/mL | TP content per CPL1/% | [CPL1] in water buffer/mg mL <sup>-1</sup> | [TP]×10 <sup>4</sup> in water buffer/M |
|-----------------------------------|---------------------------------|------------------------------------------------|-----------------------|--------------------------------------------|----------------------------------------|
| 0.35                              | 0.057                           | 4 : 0                                          | 0                     | 0.175                                      | 0                                      |
|                                   |                                 | 4 : 0.3                                        | 1.2                   |                                            | 0.1                                    |
|                                   |                                 | 4 : 0.6                                        | 2.4                   |                                            | 0.2                                    |
|                                   |                                 | 4 : 1.2                                        | 4.8                   |                                            | 0.4                                    |
|                                   |                                 | 4 : 1.8                                        | 7.3                   |                                            | 0.6                                    |
|                                   |                                 | 4 : 2.4                                        | 9.6                   |                                            | 0.8                                    |

**Table S2.** Concentrations of reagents and conditions for TP encapsulation in CPL2

| [CPL2] in IPA/ mg mL <sup>-1</sup> | [TP] in IPA/mg mL <sup>-1</sup> | Volume ratios of solutions copolymer and TP/mL | TP content per CPL2/% | [CPL2] in water buffer/mg mL <sup>-1</sup> | [TP] ×10 <sup>5</sup> in water buffer/M |
|------------------------------------|---------------------------------|------------------------------------------------|-----------------------|--------------------------------------------|-----------------------------------------|
| 0.17                               | 0.21                            | 4:0                                            | 0                     | 0.085                                      | 0                                       |
|                                    |                                 | 4:0.05                                         | 1.5                   |                                            | 0.6                                     |
|                                    |                                 | 4:0.1                                          | 3.0                   |                                            | 1.2                                     |
|                                    |                                 | 4:0.15                                         | 4.5                   |                                            | 1.8                                     |
|                                    |                                 | 4:0.2                                          | 6.0                   |                                            | 2.4                                     |
|                                    |                                 | 4:0.25                                         | 7.5                   |                                            | 3.0                                     |
|                                    |                                 | 4:0.3                                          | 9.0                   |                                            | 3.7                                     |

**Table S3.** Concentrations of reagents and conditions for TP encapsulation in CPL2

| [CPL2] in IPA/ mg mL <sup>-1</sup> | [TP] in IPA/mg mL <sup>-1</sup> | Volume ratios of solutions copolymer and TP/mL | TP content per CPL2/% | [CPL2] in water buffer/mg mL <sup>-1</sup> | [TP] ×10 <sup>5</sup> in water buffer/M |
|------------------------------------|---------------------------------|------------------------------------------------|-----------------------|--------------------------------------------|-----------------------------------------|
| 0.17                               | 0.47                            | 4:0                                            | 0                     | 0.085                                      | 0                                       |
|                                    |                                 | 4:0.05                                         | 3.5                   |                                            | 1.4                                     |
|                                    |                                 | 4:0.1                                          | 6.9                   |                                            | 2.7                                     |
|                                    |                                 | 4:0.15                                         | 10.4                  |                                            | 4.1                                     |
|                                    |                                 | 4:0.2                                          | 13.8                  |                                            | 5.5                                     |

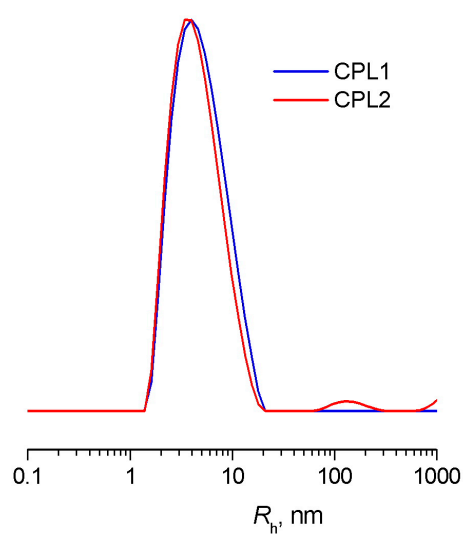

**Figure S1.** Intensity of light scattering distribution curves by IPA solution of CPL1 and CPL2 at 25 °C. The copolymers concentrations were 7 mg mL<sup>-1</sup>.

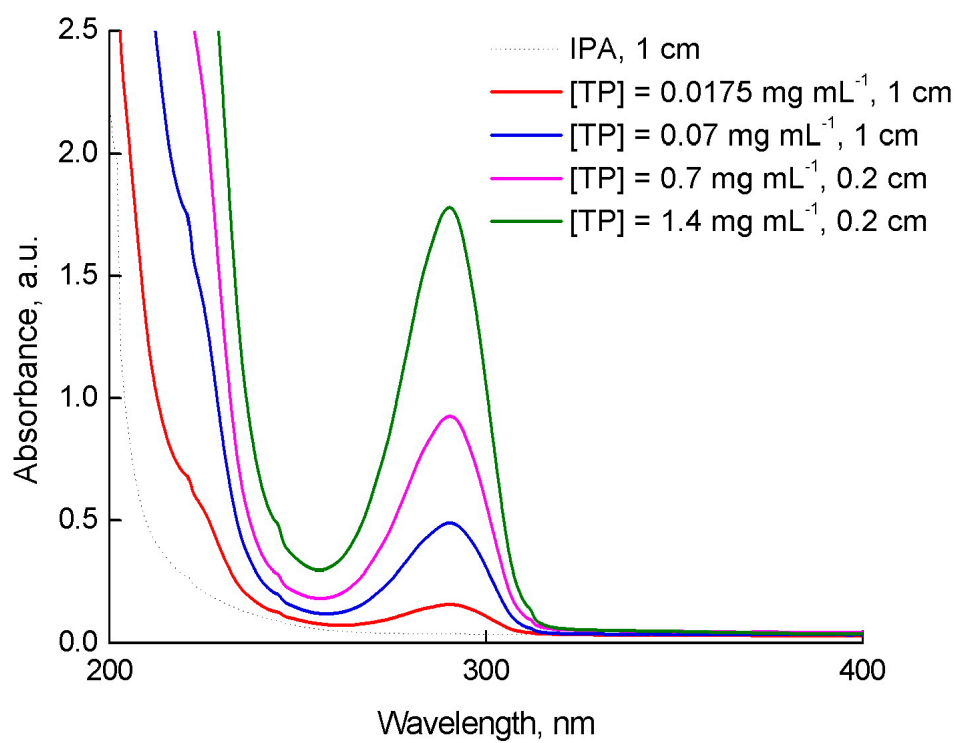

**Figure S2.** Absorption spectra of TP solutions in IPA. Cuvettes were 0.2 or 1 cm.

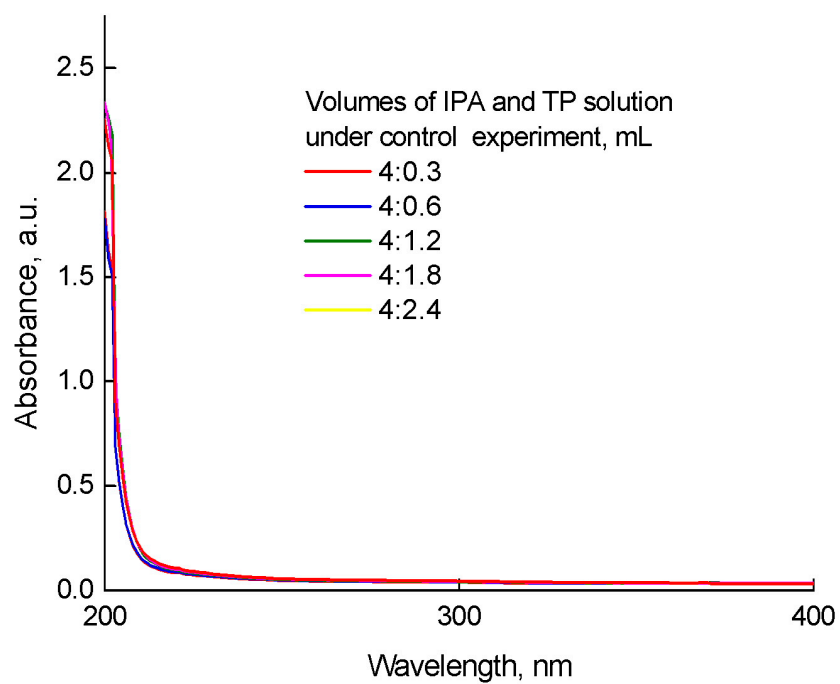

**Figure S3.** Absorption spectra of aqueous buffer solution in control experiments performed without a copolymer. Cuvette is 1 cm.

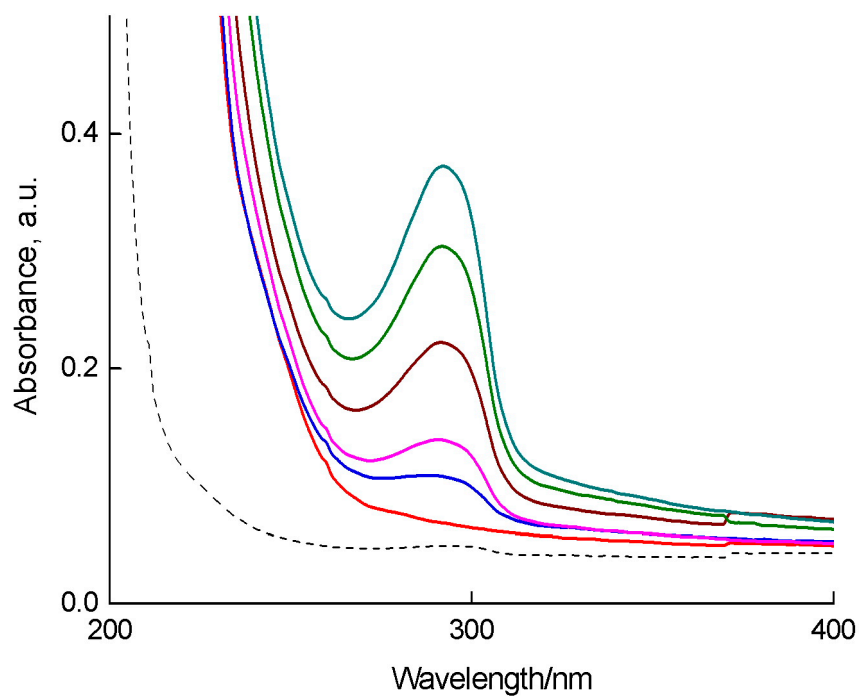

**Figure S4.** Absorption spectra of CPL1-TP in aqueous buffer solution (pH 7.2-7.4), the curves correspond to the data in Table S1. The spectrum of the water buffer is shown with a dotted line. Cuvette is 1 cm.

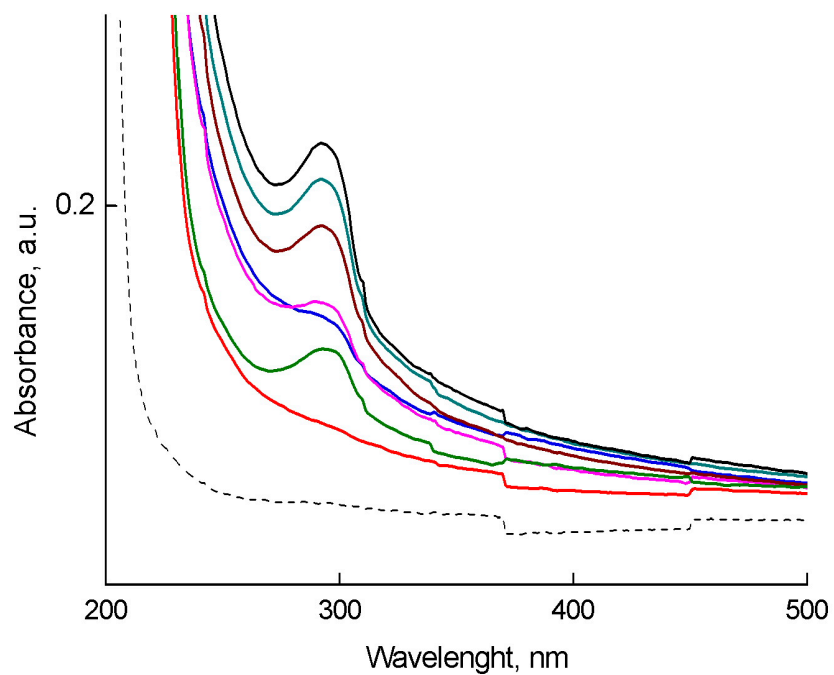

(a)

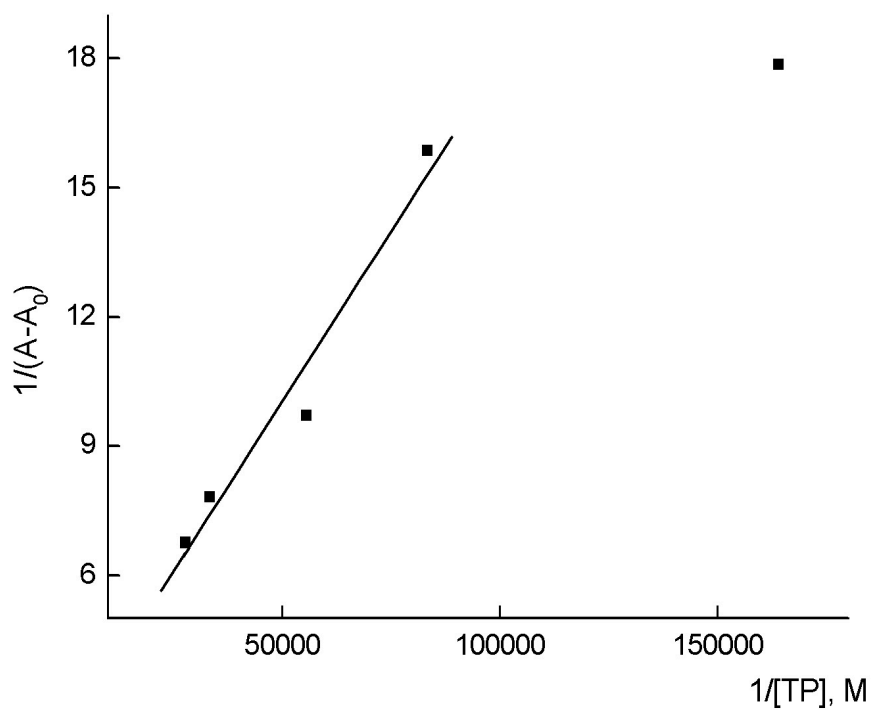

(b)

**Figure S5.** Absorption spectra (a) of CPL2-TP in aqueous buffer solution (pH 7.2-7.4), cuvette is 1 cm; curves correspond to the data in Table S2 (the spectrum of PBS is shown with a dotted line); and dependence of the optical density of the absorption band of TP on the initial concentration of TP (b) in the coordinates of the Connors equation.

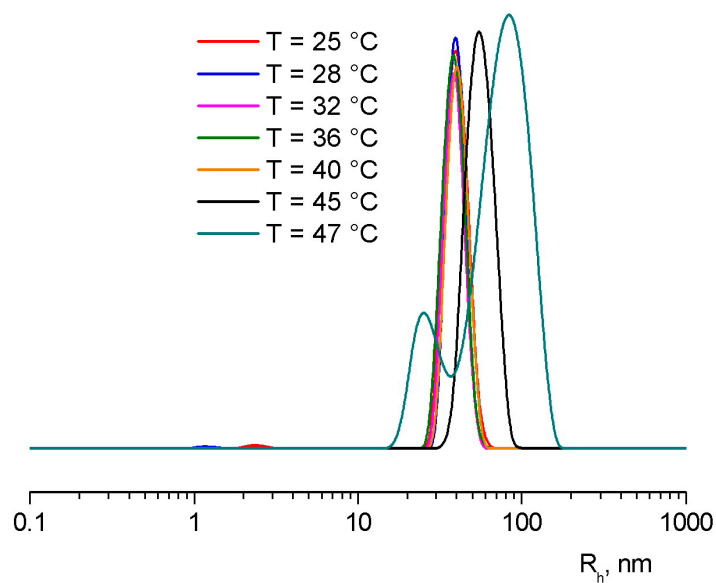

**Figure S6.** Intensity of light scattering distribution curves of CPL1-TP in PBS over the hydrodynamic radii of scattering centers in the temperature range of 25-47 °C. [CPL1-TP] = 3 mg/mL.

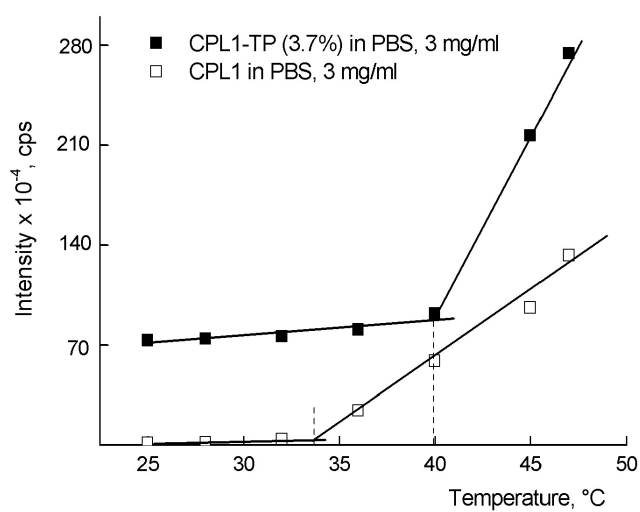

(a)

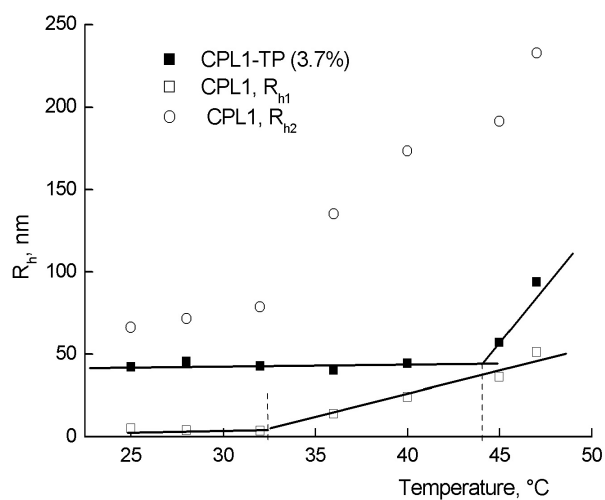

(b)

**Figure S7.** Dependencies of the light scattering intensity (a) and hydrodynamic radius (b) of scattering centers of CPL1-TP and the initial CPL1 on temperature.

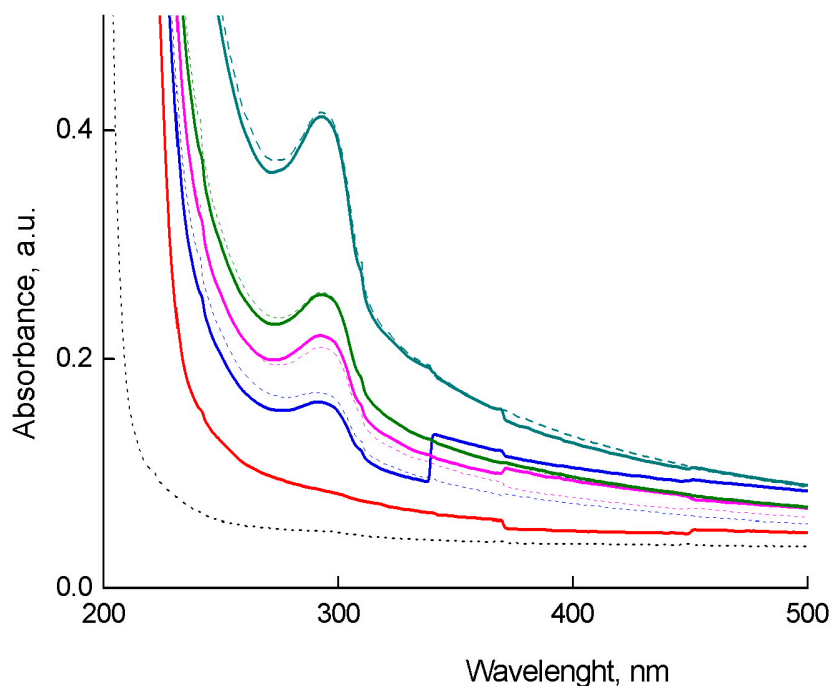

**Figure S8.** Absorption spectra of freshly prepared aqueous buffer solutions of CPL2-TP (solid line) and after storage for 3 days at room temperature (dotted line). Spectra correspond to the data in Table S3.

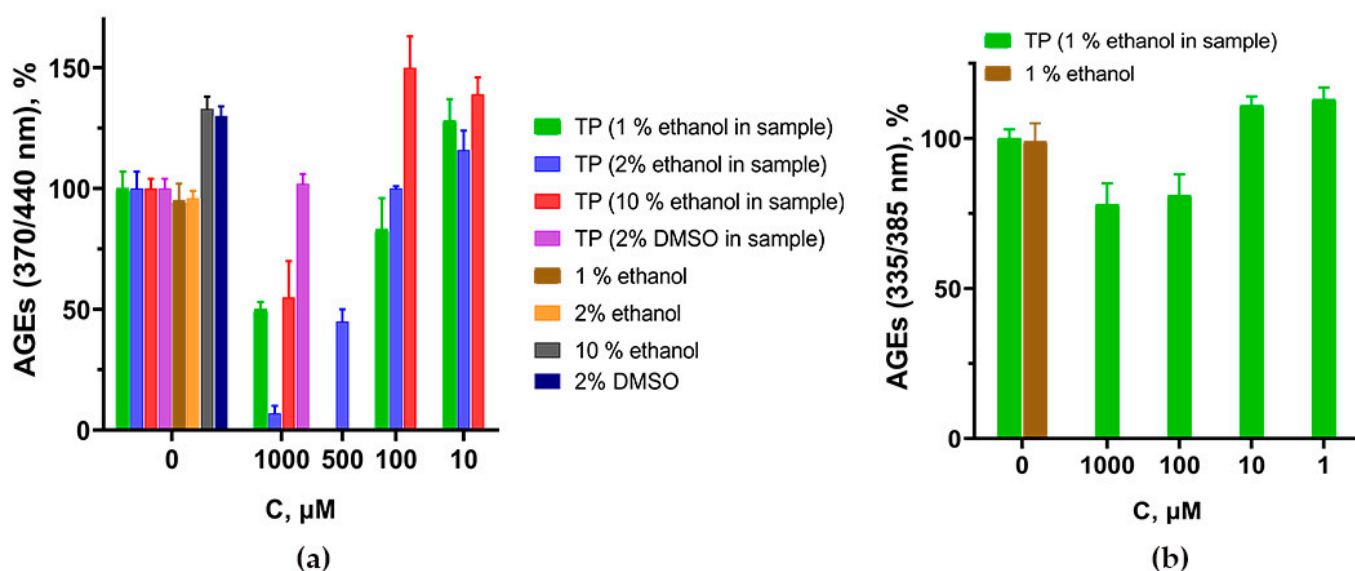

**Figure S9.** Effect of  $\alpha$ -tocopherol and solvents on vesperlysines-like AGEs (a) and pentosidine-like AGEs (b) formation during BSA glycation.  $\lambda_{exc/em}=370/440$  nm for vesperlysines-like AGEs and  $\lambda_{exc/em} = 335/385$  nm for pentosidine-like AGEs. Data are presented as value  $\pm$  SEM.
